# Supplementary material
Source: PubMed Central journal article supplement (PMC5746475)
Supplement: NIHMS914542-supplement-GRAPHIC_IMAGE.pdf [file NIHMS914542-supplement-GRAPHIC_IMAGE.pdf]

## SOAT1 gene

AKR genomic deletions

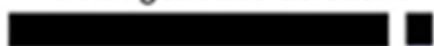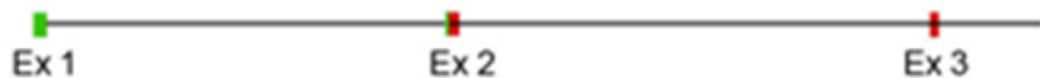

## ACAT1 protein

DBA/2 sequence

MSLRNRLSKSGENPEQDEAQKNFMDPYRNGHITMKQLIAKKRLLAAEAEEL...

AKR sequence

MKQLIAKKRLLAAEAEEL...

DBA/2 *Soat1* allele

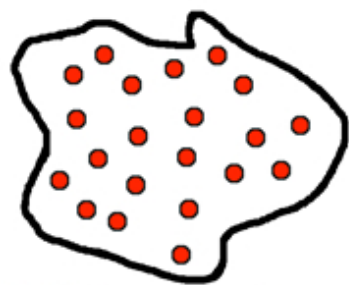

DBA/2 macrophage

CRISPR/Cas9  
*Soat1* editing

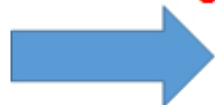

AKR *Soat1* allele

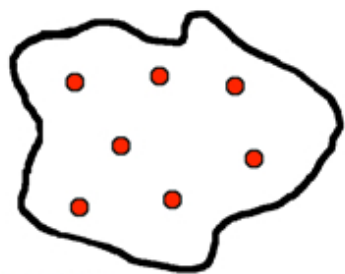

DBA/2 macrophage
