# Supplementary material
Source: PubMed Central journal article supplement (PMC5746475)
Supplement: NIHMS914542-supplement-Supplemental_Material.pdf [file NIHMS914542-supplement-Supplemental_Material.pdf]

## Supplemental Results

Mcmm2 is a very small locus at the distal end of chromosome 1 with a Bayesian credible interval of 184.65-184.89 Mb. This locus harbors only three genes; *Tlr5*, *Susd4*, and *4922505E12Rik (Ccdc185)*. There are numerous SNPs and Indels between the AKR and DBA/2 strains in this region<sup>1</sup>, although none of these genes have a missense mutation or an aberrant translation termination codon, nor did they have a BMDM cis-eQTL in our prior studies.

Mcmm4 is located in the middle of chromosome 5 with a Bayesian credible interval of 68.02-107.43 Mb and harbors 428 genes. The top candidates for this locus are *Mepe*, *Spp1*, and *Pkd2*. *Mepe* has 27 non-synonymous SNPs between AKR and DBA/2 mice, 4 of which are predicted to be deleterious by PROVEAN. Additionally, MEPE was associated with cardiovascular risk factors in a human GWAS study.<sup>2</sup> *Spp1* and especially *Pkd2* had strong BMDM cis-eQTL LOD scores in our prior studies, and both had many PubMed hits when searched for associations with cholesterol and atherosclerosis.

Mcmm5 is located at the distal end of chromosome 6 with a Bayesian credible interval of 118.95-122.59 Mb and harbors 64 genes. *Bid* and *Atp6v1e1* stood out as top candidates because of their relatively strong BMDM cis-eQTL scores in our prior studies.

Mcmm6 is located at the proximal end of chromosome 9 with a Bayesian credible interval of 3.58-34.82 Mb and harbors 318 genes. *Casp1* is the top candidate for this locus, as it had a modest BMDM cis-eQTL LOD score in our prior studies and had many PubMed hits for our terms of interest: cholesterol, lysosome, autophagy, and atherosclerosis. *Fli1* is also a candidate due to its strong BMDM cis-eQTL score.

Mcmm7 is a very large locus located on chromosome 10 with a Bayesian credible interval of 3.15-129.61 Mb and harbors 1,462 genes. It is difficult to settle on a top candidate gene for this interval, but *Os9* seems plausible, as it had a strong BMDM cis-eQTL in prior studies and was shown to be associated with lipid storage in adipocytes.<sup>3</sup>

Mcmm8 is located at the proximal end of chromosome 11 with a Bayesian credible interval of 4.03-36.44 Mb and harbors 468 genes. *Camk2b* is the strongest candidate gene for this locus, as it had a very strong BMDM cis-eQTL. Also, SNPs near CAMK2B are associated with metabolic syndrome in a human GWAS study.<sup>4</sup>

Mcmm9 is located at the distal end of chromosome 12 with a Bayesian credible interval of 79.09-95.60 Mb and harbors 220 genes. There is no clear candidate gene at this locus.

Mcmm10 is located at the distal end of chromosome 17 with a Bayesian credible interval of 68.68-89.29 Mb and harbors 191 genes. The strongest candidate is *Dync2li1* which had a very strong BMDM cis-eQTL. SNPs near DYNC2LI1 are also associated with C-reactive protein levels and total cholesterol levels in a human GWAS study.<sup>5</sup>

## **Supplemental Figure and Tables**

Supplemental Figure I  
Supplemental Figure II  
Supplemental Figure III  
Supplemental Figure IV  
Supplemental Figure V  
Supplemental Figure VI  
Supplemental Figure VII

Supplemental Table I  
Supplemental Table II  
Supplemental Table III  
Supplemental Table IV  
Supplemental Table V

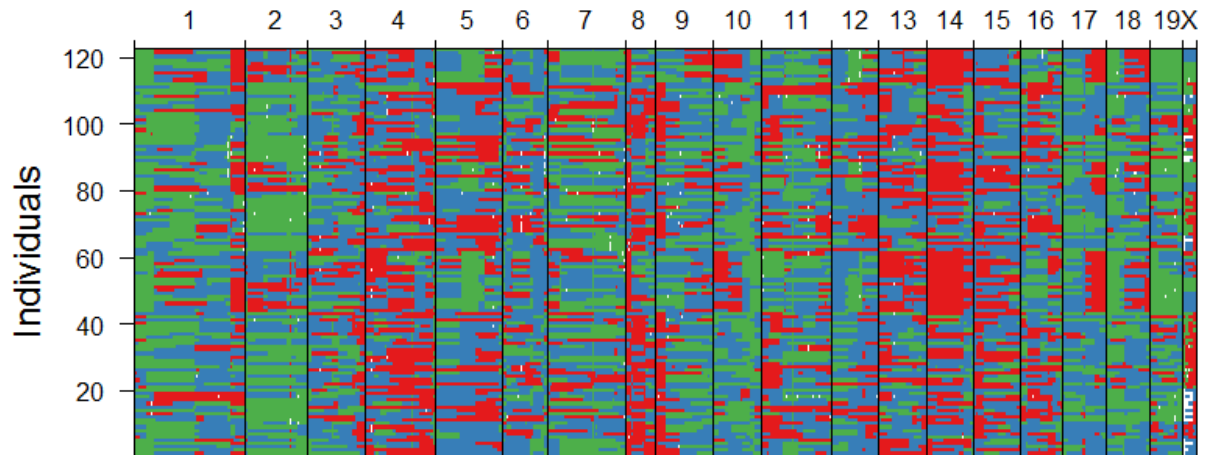

**Supplemental Figure I. Genotype map for 122 F4 AKR x DBA/2 mice.** Results from the GeneSeek MegaMUGA SNP array. Red denotes an AKR allele for a specific marker, green denotes DBA/2, and blue denotes a heterozygous genotype. White denotes markers that did not satisfy our quality filtering criteria. 16,975 informative SNPs were used for QTL analyses.

## Cholesterol Ester/Free Cholesterol

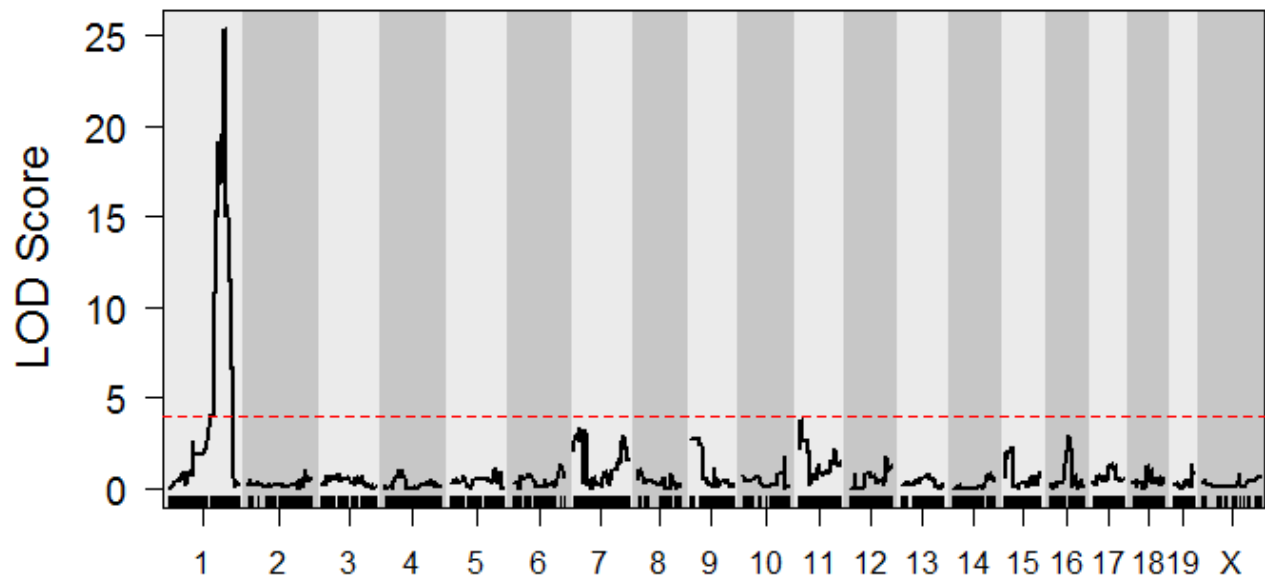

**Supplemental Figure II. LOD plot for CE/FC ratio when a lower acLDL concentration was used.** *Mcmm1* was the only locus to reach the genome wide significance threshold of 3.99 ( $\alpha = 0.05$ ) determined permutation analysis. Max LOD score for *Mcmm1* = 25.4.

**A**

CTAGACCGCCGAGCTGCCCTCCGCTCGCAGGAAGCTTGATTGATAGTGGGAGAAGAGAAGATGTCACTAAGA  
AACCGGCTGTCAAATCTGGTGAGAATCCTGAGCAAGATGAAGCCCAGAAAAATTTTCATGGACACATACAGAAAT  
GGTCACATTACCATGAAACAGTTGATAGCCAAGAAGAGGCTGTTGGCAGCAGAGGCCGGAGGAGCTGAAGCCAC  
TGTATGAAGGAAGTTGGGTGCCACTTCGATGACTTTGTGACCAACCTCATTGAAAAGTCCGCATCGCTGGACA  
ATGGTGGGTGTGCACTCACAACCTTCTCCATTCTTGAAGAAATGAAAAAGAACCACAGAGCCAAAGATCTGAGAG  
CACCTCCAGAACAAGGGAAGATTTTTATTTCAAGGCAGTCTCTTTAGACGAGCTGTTTGAAGTGGACCACATCA  
GAACAATTTACCACATGTTTCATCGCACTCCTCATCCTCTTCGTCCTCAGCACGGTCGTCGTGGACTACATTGATG  
AAGGAAGGCTGGTACTTGAGTTCAATCTCCTGGCCTATGCTTTTGGCAAATTCCTACTGTTATTTGGACATGGT  
GGCCATGTTCTGTCTACACTGTCAATCCCCTATTTCTGTTCCAGCGATGGGCCACGGTTACAGCAAGAGTT  
CTTACCCATTGATCTATTCCCTGTCCATGGCTTGCTCTTCTTAGTCTTTCAACTTGGAGTTCTAGGTTTTGTGCC  
AACATACGTTGTCTTAGCATAACACTGCCACCAGCCTCCCGTTCATTCTGATACTGGAACAGATTTCGTTTGAT  
AATGAAGGCTCACTCATTGTGAGAGAGAATATCCACGAGTACTAAATGCAGCCAAGGAGAAATCAAGCAAAGA  
TCCACTACCCACAGTCAACCAGTACCTGTACTTCTGTTTGCGCCACACTTATTTACCGAGACAACACTACCCAAG  
GACTCCTACTGTAAGATGGGGTTATGTCGCTATGCAGTTTTTACAGGTGTTTGGCTGCCTGTTTTATGTGTACTAC  
ATCTTTGAGAGACTCTGTGCCCACTATCCGGAATATCAAACAGGAGCCCTTCAGTGCTCGTGTCTGCTGGTCTG  
TGTGTGTTAACTCCATCTTCCAGGTGTCTTGATACTGTTCTTTCTGTTTGCCTTTTGCCTTTTGCCTGGCTCA  
ATGCCTTTGCTGAGATGTTACGCTTTGGTGACAGGATGTTTTATAAGGACTGGTGGAACTCTACATCATACTCCA  
ACTACTACAGGACCTGGAACGTGGTGGTGCACGACTGGCTCTACTACTATGTTTACAAAGACCTGCTCTGGTTTT  
TCTCGAAGAGGTTCAAATCTGCCGCCATGCTGGCCGTCTTCGCCCTGTCGGCTGTGGTGCACGAGTATGCCCTC  
GCCATCTGCCTGAGTTACTTCTACCCGGTGTCTTTCGTGCTCTTCATGTTCTTTGGAATGGCTTTTAACTTCATTG  
TTAACGACAGTCGAAAAGGCCAATCTGGAACATCATGGTTTGGGCTTCTCTGTTTCTGGGCTATGGACTCATT  
TGTGCTTTTATTCTCAAGAGTGGTATGCCCGCCAGCACTGTCTCTGAAGAACCCTACATTTCTGGATTATGTCC  
GGCCGCGGACCTGCACTTGTCCGTACGTGTTTTAGAAGCCCTGGCTCTGCCTCCTTGTGGCATTGAAGATTG  
GATAT

**B**

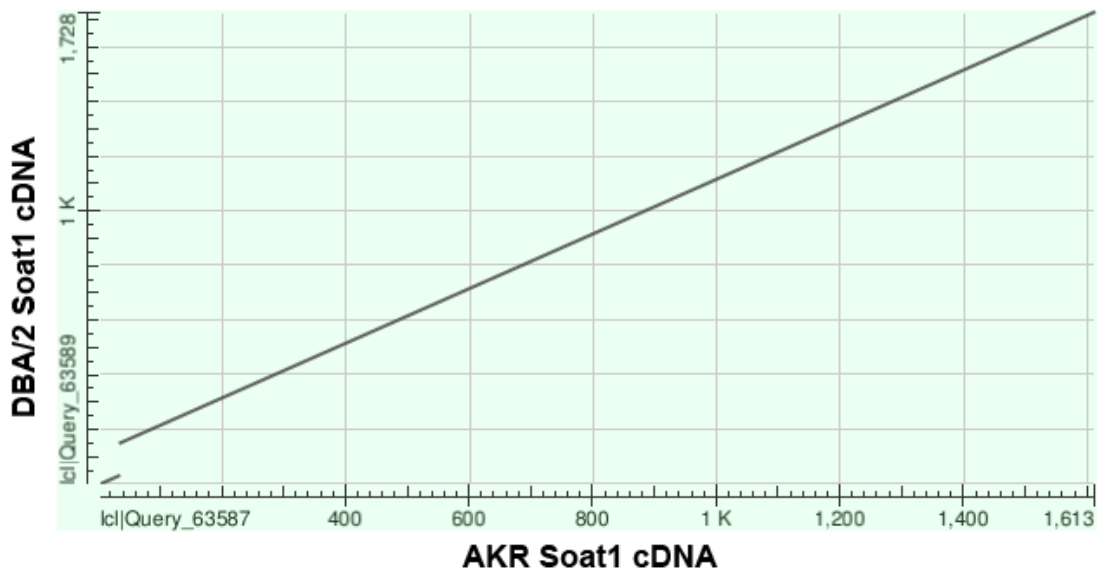

**Supplemental Figure III. Alignment of AKR and DBA/2 *Soat1* cDNAs.** **A.** DBA/2 *Soat1* cDNA sequenced from 3 overlapping cDNA PCR fragments. The sequence deleted in the AKR *Soat1* cDNA is underlined. **B.** AKR and DBA/2 cDNA sequence matrix alignment plot from Blast 2n analysis. The break in the line shows the 118 pb deletion in the AKR cDNA.

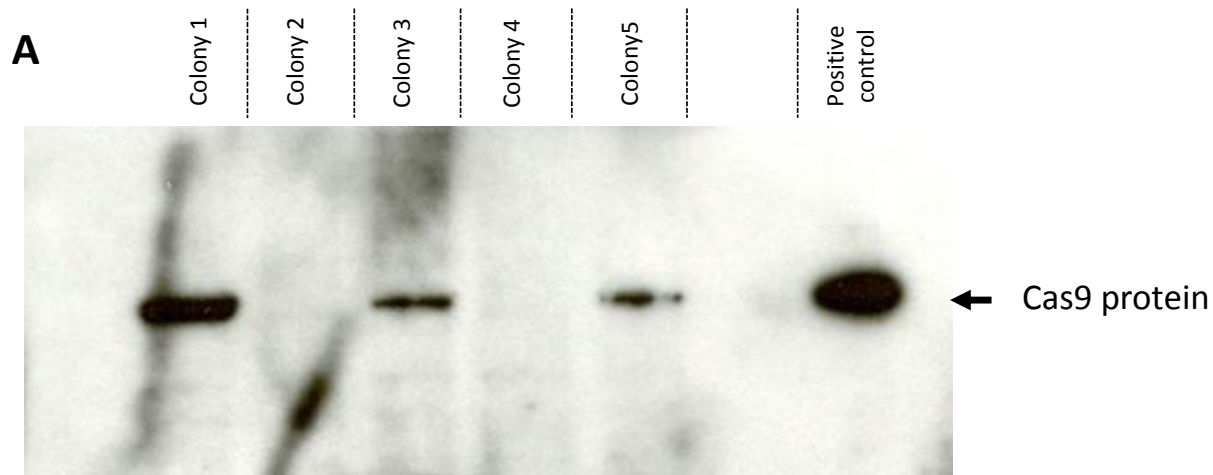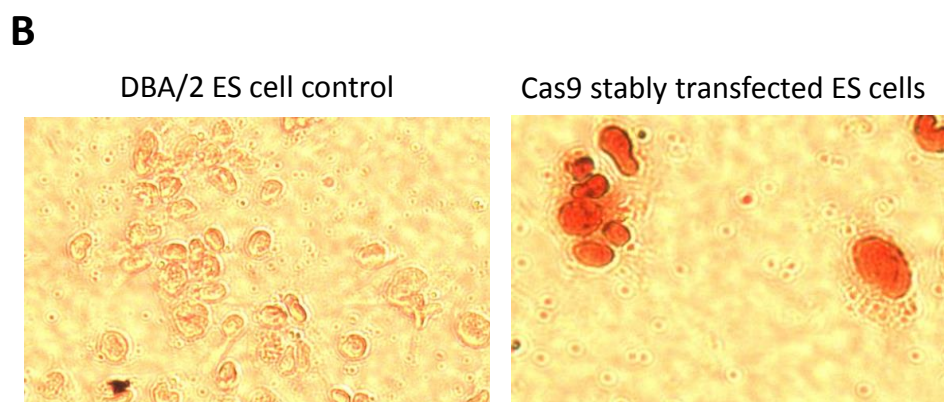

**Supplemental Figure IV. DBA/2 ES cells stably transfected with Cas9. A.** Western blot of Cas9 protein from 5 different transfected colonies. Positive control was Cas9 protein obtained from New England BioLabs (#M0386). Colony 1 was expanded for further study. **B.** Immunohistochemistry of Cas9 protein in Colony 1 cell line vs. control DBA/2 ES cells.

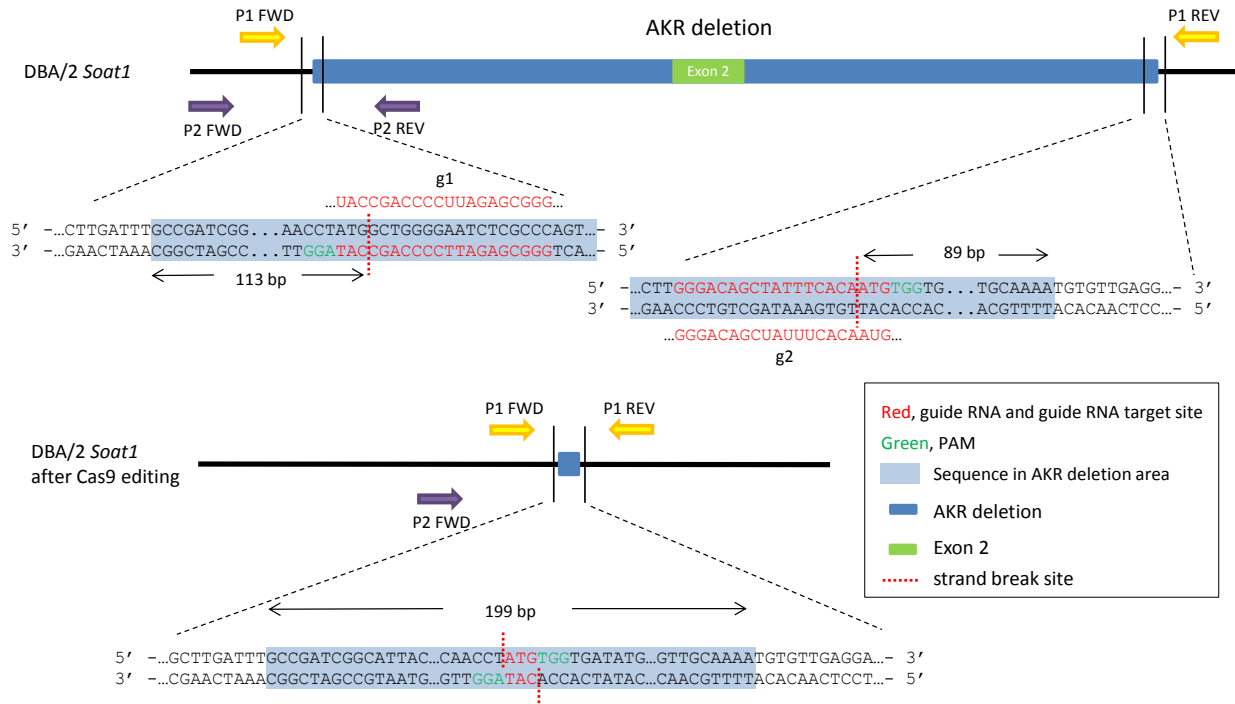

**Supplemental Figure V. Cas9 editing of DBA/2 *Soat1* genomic region to delete exon 2 and flanking sequence. Top.** Design of two sgRNAs flanking exon 2 to create a deletion similar but not identical to the 6818bp deletion observed in AKR *Soat1* gene. **Bottom.** Sequencing the deleted allele by PCR, which displayed a 6619bp deletion. We expected the deletion junction to contain a repeat of an ATG sequence based upon the Cas9 cut site 3bp upstream of the PAM sequence; however, the repeated ATG sequence was modified during non-homologous end joining to remove one copy of the ATG sequence.

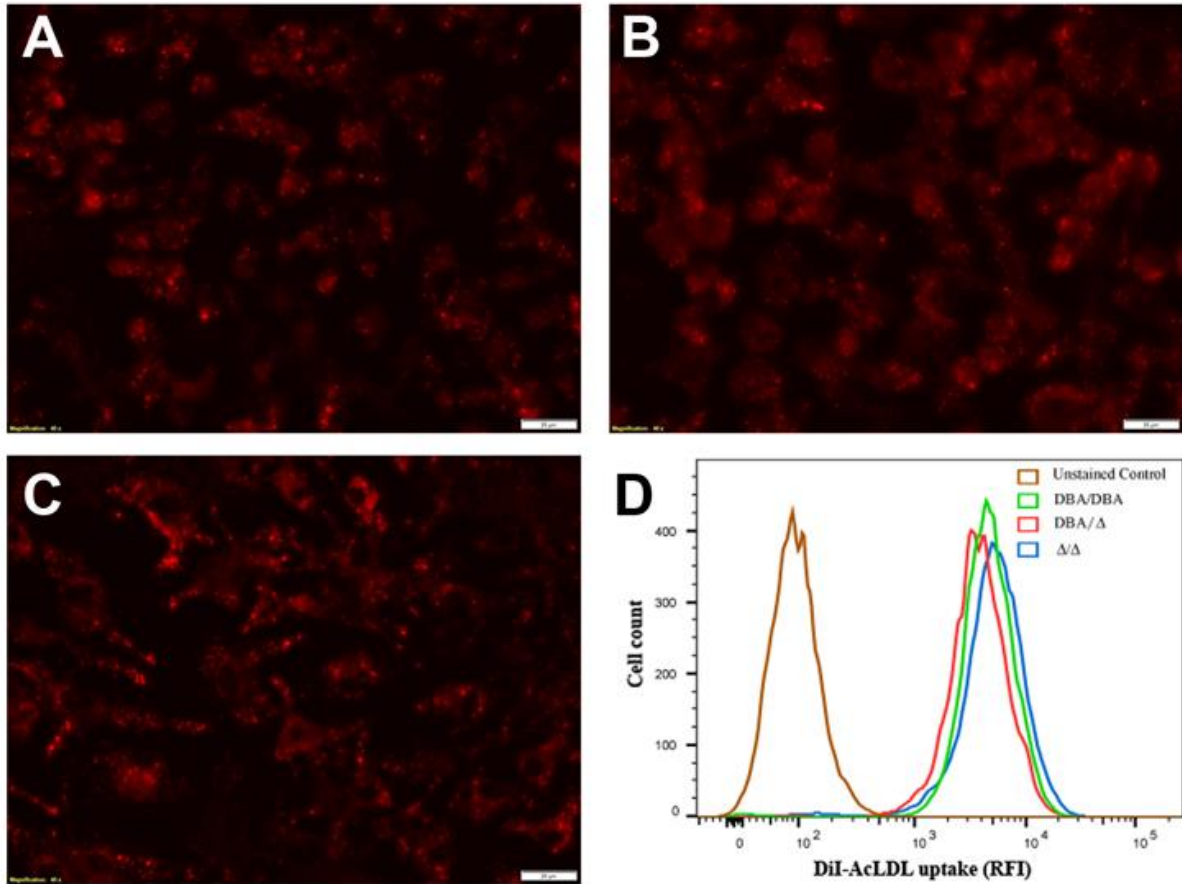

**Supplemental Figure VI. DiI AcLDL uptake by ESDMs. A-C.** DiI AcLDL uptake after a 30 min incubation at 37°C observed by epifluorescence microscopy of DBA/DBA, DBA/Δ, and Δ/Δ ESDMs, respectively. Scale bar show 20 μm. All images were taken at the same settings for comparison of fluorescent intensity. **D.** Flow cytometry data showing that all three cell lines had similar levels of DiI AcLDL uptake, and <3 % of cells were negative for uptake of DiI AcLDL. Brown, unstained control cells; green, DBA/DBA cells; red, DBA/Δ cells; and blue, Δ/Δ cells. For all panels, ESDMs were analyzed 14 days after plating macrophage progenitor cells.



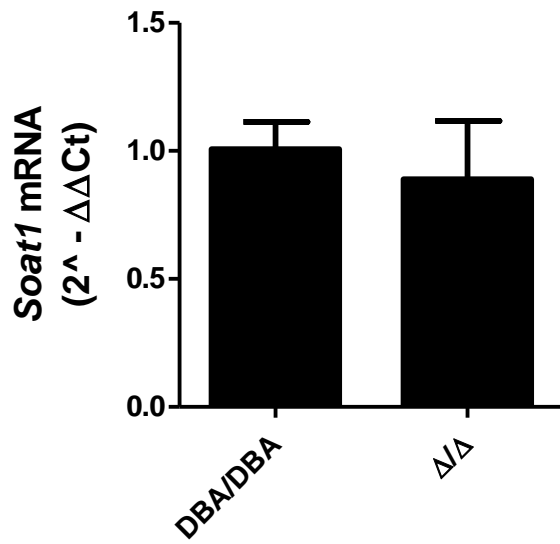

**Supplemental Figure VII. *Soat1* mRNA qPCR.** cDNA was prepared from RNA isolated from DBA/DBA and  $\Delta/\Delta$  ESDMs and assessed for *Soat1* mRNA levels by qPCR normalized to *Actb* mRNA levels as described in the online-only Supplemental Methods section (n=3 RNA preps assayed in triplicate  $\pm$  S.D.)

| Gene Name     | Chr      | Mb Position   | Gene Description                                                      | Mb from LOD peak | eQTL LOD    | PubMed cholesterol <sup>a</sup> | PubMed lysosome <sup>a</sup> | PubMed autophagy <sup>a</sup> | PubMed atherosclerosis <sup>a</sup> | Nonsynon snps | LOD nearest flanking marker | PROVEAN deleterious aa change |
|---------------|----------|---------------|-----------------------------------------------------------------------|------------------|-------------|---------------------------------|------------------------------|-------------------------------|-------------------------------------|---------------|-----------------------------|-------------------------------|
| Zfp648        | 1        | 156.05        | zinc finger protein 648                                               | 0.30             | -           | 0                               | 0                            | 0                             | 0                                   | 6             | 10.8                        | 0                             |
| n-R5s220      | 1        | 156.16        | nuclear encoded rRNA 5S 220                                           | 0.19             | -           | 0                               | 0                            | 0                             | 0                                   | 0             | 10.8                        | 0                             |
| Cacna1e       | 1        | 156.24        | calcium channel, voltage-dependent, R type, alpha 1E subunit          | 0.11             | -           | 1                               | 2                            | 1                             | 0                                   | 1             | 10.8                        | 0                             |
| Gm9530        | 1        | 156.91        | predicted gene 9530                                                   | 0.56             | -           | 0                               | 0                            | 0                             | 0                                   | 0             | 10.8                        | 0                             |
| Ier5          | 1        | 156.94        | immediate early response 5                                            | 0.60             | -           | 0                               | 0                            | 0                             | 0                                   | 0             | 10.8                        | 0                             |
| Mr1           | 1        | 156.98        | major histocompatibility complex, class I-related                     | 0.63             | -           | 0                               | 2                            | 0                             | 0                                   | 4             | 10.8                        | 0                             |
| Stx6          | 1        | 157.01        | syntaxin 6                                                            | 0.66             | 9.1         | 3                               | 4                            | 1                             | 0                                   | 1             | 10.8                        | 0                             |
| BC034090      | 1        | 157.06        | cDNA sequence BC034090                                                | 0.71             | -           | 0                               | 0                            | 0                             | 0                                   | 9             | 10.8                        | 0                             |
| Xpr1          | 1        | 157.12        | xenotropic and polytropic retrovirus receptor 1                       | 0.78             | -           | 0                               | 0                            | 1                             | 1                                   | 0             | 10.8                        | 0                             |
| AC116712.1    | 1        | 157.16        | NA                                                                    | 0.82             | -           | 0                               | 0                            | 0                             | 0                                   | 0             | 10.8                        | 0                             |
| Gm5532        | 1        | 157.37        | predicted gene 5532                                                   | 1.02             | -           | 0                               | 0                            | 0                             | 0                                   | 0             | 10.8                        | 0                             |
| Acbd6         | 1        | 157.41        | acyl-Coenzyme A binding domain containing 6                           | 1.06             | -           | 0                               | 0                            | 0                             | 0                                   | 0             | 10.8                        | 0                             |
| Lhx4          | 1        | 157.55        | LIM homeobox protein 4                                                | 1.20             | -           | 0                               | 0                            | 0                             | 0                                   | 0             | 10.8                        | 0                             |
| Qsox1         | 1        | 157.63        | quiescin Q6 sulfhydryl oxidase 1                                      | 1.28             | -           | 0                               | 1                            | 1                             | 2                                   | 0             | 10.8                        | 0                             |
| Cep350        | 1        | 157.69        | centrosomal protein 350                                               | 1.34             | -           | 0                               | 0                            | 0                             | 0                                   | 0             | 10.8                        | 0                             |
| U2            | 1        | 157.8         | U2 spliceosomal RNA                                                   | 1.45             | -           | 4                               | 2                            | 4                             | 4                                   | 0             | 10.8                        | 0                             |
| Tor1aip1      | 1        | 157.85        | torsin A interacting protein 1                                        | 1.50             | 2.6         | 0                               | 0                            | 0                             | 0                                   | 0             | 10.8                        | 0                             |
| Tor1aip2      | 1        | 157.88        | torsin A interacting protein 2                                        | 1.54             | -           | 0                               | 0                            | 0                             | 0                                   | 0             | 10.8                        | 0                             |
| Fam163a       | 1        | 157.92        | family with sequence similarity 163, member A                         | 1.58             | -           | 0                               | 0                            | 0                             | 0                                   | 0             | 10.8                        | 0                             |
| Tdrd5         | 1        | 158.19        | tudor domain containing 5                                             | 1.84             | -           | 0                               | 0                            | 0                             | 0                                   | 0             | 10.8                        | 0                             |
| Nphs2         | 1        | 158.24        | nephrosis 2 homolog, podocin (human)                                  | 1.89             | -           | 17                              | 3                            | 4                             | 2                                   | 0             | 10.8                        | 0                             |
| 9430070O13Rik | 1        | 158.3         | RIKEN cDNA 9430070O13 gene                                            | 1.95             | -           | 0                               | 0                            | 0                             | 0                                   | 0             | 10.8                        | 0                             |
| Gm2000        | 1        | 158.3         | predicted gene 2000                                                   | 1.95             | -           | 0                               | 0                            | 0                             | 0                                   | 0             | 10.8                        | 0                             |
| <b>Soat1</b>  | <b>1</b> | <b>158.36</b> | <b>sterol O-acyltransferase 1</b>                                     | <b>2.01</b>      | <b>23.2</b> | <b>26</b>                       | <b>1</b>                     | <b>1</b>                      | <b>3</b>                            | <b>0</b>      | <b>10.8</b>                 | <b>0</b>                      |
| Gm10031       | 1        | 158.45        | predicted pseudogene 10031                                            | 2.11             | -           | 0                               | 0                            | 0                             | 0                                   | 0             | 10.8                        | 0                             |
| Abl2          | 1        | 158.49        | v-abl Abelson murine leukemia viral oncogene homolog 2 (arg, Abelson) | 2.14             | -           | 1                               | 0                            | 0                             | 0                                   | 0             | 10.8                        | 0                             |
| Tor3a         | 1        | 158.58        | torsin family 3, member A                                             | 2.24             | 2.7         | 0                               | 0                            | 0                             | 0                                   | 0             | 10.8                        | 0                             |
| Fam20b        | 1        | 158.61        | family with sequence similarity 20, member B                          | 2.26             | -           | 0                               | 0                            | 0                             | 0                                   | 0             | 10.8                        | 0                             |
| Gm15428       | 1        | 158.72        | predicted pseudogene 15428                                            | 2.38             | -           | 0                               | 0                            | 0                             | 0                                   | 0             | 10.8                        | 0                             |
| Ralgps2       | 1        | 158.73        | Ral GEF with PH domain and SH3 binding motif 2                        | 2.39             | -           | 0                               | 0                            | 0                             | 0                                   | 0             | 10.8                        | 0                             |
| Angpt1        | 1        | 158.77        | angiopoietin-like 1                                                   | 2.42             | -           | 1                               | 0                            | 0                             | 2                                   | 0             | 10.8                        | 0                             |
| 1700057K13Rik | 1        | 159.03        | RIKEN cDNA 1700057K13 gene                                            | 2.68             | -           | 0                               | 0                            | 0                             | 0                                   | 3             | 10.8                        | 0                             |
| Rasal2        | 1        | 159.07        | RAS protein activator like 2                                          | 2.72             | -           | 0                               | 0                            | 0                             | 0                                   | 0             | 10.8                        | 0                             |
| Gm6058        | 1        | 159.31        | predicted gene 6058                                                   | 2.97             | -           | 0                               | 0                            | 0                             | 0                                   | 0             | 10.8                        | 0                             |

<sup>a</sup>, Number of PubMed results for gene name AND listed subject term

Yellow highlighting denotes our top candidate genes at this QTL

### Supplemental Table I. All genes in Mcmm1 locus.

| Differentiation day* | % Dil AcLDL positive |
|----------------------|----------------------|
| Unstained Control    | 0.87%                |
| Day 3                | 1.35%                |
| Day 5                | 2.44%                |
| Day 7                | 41.3%                |
| Day 9                | 68.7%                |
| Day 11               | 87.4%                |
| Day 13               | 96.9%                |

**Supplemental Table II. Time course of DBA/2 ESDM differentiation.** ES cells were differentiated into ESDMs, as described in the methods section. The percentage of Dil acLDL uptake was measured by flow cytometry over the differentiation period, and was used as a proxy for differentiation into ESDMs.

\*, Number of days after plating EB derived macrophage progenitors in differentiation medium.

Supplemental Table III. Top candidate genes at *Mcmm2* -*Mcmm10*

| Locus | Gene Name                  | Chr | Mb Position | Gene Description                                                         | Mb from LOD peak | eQTL LOD | PubMed cholesterol <sup>8</sup> | PubMed lysosome <sup>9</sup> | PubMed autophagy <sup>9</sup> | PubMed atherosclerosis <sup>9</sup> | Nonsynon snps | LOD nearest flanking marker | PROVEAN deleterious aa change |
|-------|----------------------------|-----|-------------|--------------------------------------------------------------------------|------------------|----------|---------------------------------|------------------------------|-------------------------------|-------------------------------------|---------------|-----------------------------|-------------------------------|
| Mcmm2 | 4922505E12Rik <sup>b</sup> | 1   | 184.68      | RIKEN cDNA 4922505E12 gene                                               | 0.02             | 0        | 0                               | 0                            | 0                             | 0                                   | 0             | 5.6                         | 0                             |
| Mcmm2 | Sus4 <sup>b</sup>          | 1   | 184.69      | sushi domain containing 4                                                | 0.04             | 0        | 0                               | 0                            | 0                             | 0                                   | 0             | 5.6                         | 0                             |
| Mcmm2 | Tlr5 <sup>b</sup>          | 1   | 184.88      | toll-like receptor 5                                                     | 0.23             | 0        | 4                               | 5                            | 8                             | 8                                   | 0             | 5.6                         | 0                             |
| Mcmm3 | Stk35                      | 2   | 129.63      | serine/threonine kinase 35                                               | 10.65            | 22.7     | 0                               | 0                            | 0                             | 0                                   | 0             | 4.7                         | 0                             |
| Mcmm3 | Ciao1                      | 2   | 127.07      | cytosolic iron-sulfur protein assembly 1 homolog (S. cerevisiae)         | 8.09             | 16.3     | 1                               | 0                            | 0                             | 0                                   | 0             | 4.7                         | 0                             |
| Mcmm3 | Mertk                      | 2   | 128.52      | c-mer proto-oncogene tyrosine kinase                                     | 9.55             | 14       | 10                              | 3                            | 4                             | 23                                  | 0             | 4.7                         | 0                             |
| Mcmm3 | Vps39                      | 2   | 120.14      | vacuolar protein sorting 39 (yeast)                                      | 1.17             | 12.9     | 0                               | 13                           | 5                             | 0                                   | 0             | 4.7                         | 0                             |
| Mcmm3 | Adam33                     | 2   | 130.88      | a disintegrin and metallopeptidase domain 33                             | 11.9             | 12.8     | 1                               | 0                            | 0                             | 4                                   | 0             | 4.7                         | 0                             |
| Mcmm3 | Nduaf1                     | 2   | 119.48      | NADH dehydrogenase (ubiquinone) 1 alpha subcomplex, assembly factor 1    | 0.51             | 8.4      | 0                               | 0                            | 1                             | 0                                   | 0             | 4.7                         | 0                             |
| Mcmm3 | Fahd2a                     | 2   | 127.26      | fumarylacetoacetate hydrolase domain containing 2A                       | 8.29             | 6.9      | 0                               | 0                            | 0                             | 0                                   | 0             | 4.7                         | 0                             |
| Mcmm3 | Bcl2l1                     | 2   | 127.95      | BCL2-like 11 (apoptosis facilitator)                                     | 8.98             | 6.7      | 4                               | 12                           | 38                            | 2                                   | 0             | 4.7                         | 0                             |
| Mcmm3 | 2010106G01Rik              | 2   | 126.72      | RIKEN cDNA 2010106G01 gene                                               | 7.74             | 3.8      | 0                               | 0                            | 0                             | 0                                   | 0             | 4.7                         | 0                             |
| Mcmm3 | Ncaph                      | 2   | 126.93      | non-SMC condensin I complex, subunit H                                   | 7.96             | 3.3      | 0                               | 0                            | 0                             | 0                                   | 0             | 4.7                         | 0                             |
| Mcmm3 | Ccndbp1                    | 2   | 120.83      | cyclin D-type binding-protein 1                                          | 1.86             | 3.1      | 0                               | 0                            | 0                             | 0                                   | 1             | 4.7                         | 0                             |
| Mcmm3 | Atp8b4                     | 2   | 126.15      | ATPase, class I, type 8B, member 4                                       | 7.17             | 2.8      | 0                               | 0                            | 0                             | 0                                   | 0             | 4.7                         | 0                             |
| Mcmm3 | Blvra                      | 2   | 126.9       | biliverdin reductase A                                                   | 7.92             | 2.5      | 0                               | 0                            | 0                             | 0                                   | 0             | 4.7                         | 0                             |
| Mcmm3 | Casc5                      | 2   | 118.87      | cancer susceptibility candidate 5                                        | 0.1              | -        | 0                               | 2                            | 0                             | 0                                   | 18            | 4.7                         | 1                             |
| Mcmm3 | Epb4.2                     | 2   | 120.84      | erythrocyte protein band 4.2                                             | 1.87             | -        | 0                               | 0                            | 0                             | 0                                   | 1             | 4.7                         | 1                             |
| Mcmm3 | Fbn1                       | 2   | 125.13      | fibrillin 1                                                              | 6.15             | -        | 8                               | 1                            | 0                             | 16                                  | 3             | 4.7                         | 1                             |
| Mcmm3 | Ganc                       | 2   | 120.23      | glucosidase, alpha; neutral C                                            | 1.26             | -        | 0                               | 0                            | 0                             | 0                                   | 10            | 4.7                         | 1                             |
| Mcmm3 | Nusap1                     | 2   | 119.44      | nucleolar and spindle associated protein 1                               | 0.47             | -        | 1                               | 0                            | 0                             | 0                                   | 1             | 4.7                         | 1                             |
| Mcmm3 | Pla2g4f                    | 2   | 120.13      | phospholipase A2, group IVF                                              | 1.15             | -        | 0                               | 0                            | 0                             | 0                                   | 7             | 4.7                         | 2                             |
| Mcmm3 | Spnb5                      | 2   | 119.87      | spectrin beta 5                                                          | 0.9              | -        | 0                               | 0                            | 0                             | 0                                   | 35            | 4.7                         | 6                             |
| Mcmm3 | Tmem62                     | 2   | 120.8       | transmembrane protein 62                                                 | 1.83             | -        | 0                               | 0                            | 0                             | 0                                   | 1             | 4.7                         | 1                             |
| Mcmm3 | Zfyve19                    | 2   | 119.03      | zinc finger, FYVE domain containing 19                                   | 0.06             | -        | 0                               | 0                            | 0                             | 0                                   | 4             | 4.7                         | 1                             |
| Mcmm3 | Aqr                        | 2   | 113.93      | aquarius                                                                 | 5.05             | -        | 0                               | 1                            | 1                             | 0                                   | 2             | 4.5                         | 1                             |
| Mcmm3 | Lbp                        | 2   | 158.13      | lipopolysaccharide binding protein                                       | 39.16            | 7.2      | 73                              | 4                            | 7                             | 37                                  | 3             | 4.4                         | 1                             |
| Mcmm3 | Actr5                      | 2   | 158.45      | ARPS actin-related protein 5 homolog (yeast)                             | 39.48            | 2.5      | 0                               | 0                            | 0                             | 0                                   | 1             | 4.4                         | 0                             |
| Mcmm3 | Bpi                        | 2   | 158.08      | bactericidal permeability increasing protein                             | 39.11            | -        | 15                              | 3                            | 5                             | 7                                   | 4             | 4.4                         | 1                             |
| Mcmm3 | Snhg11                     | 2   | 158.2       | small nucleolar RNA host gene 11                                         | 39.23            | -        | 0                               | 0                            | 0                             | 0                                   | 3             | 4.4                         | 1                             |
| Mcmm3 | Smox                       | 2   | 131.32      | spermine oxidase                                                         | 12.34            | 11.4     | 0                               | 0                            | 0                             | 0                                   | 0             | 4.3                         | 0                             |
| Mcmm3 | Ugcc                       | 2   | 155.67      | ubiquinol-cytochrome c reductase complex chaperone, CBP3 homolog (yeast) | 36.7             | 2.5      | 0                               | 0                            | 0                             | 0                                   | 0             | 4                           | 0                             |
| Mcmm3 | Olfir1290                  | 2   | 111.33      | olfactory receptor 1290                                                  | 7.64             | -        | 0                               | 0                            | 0                             | 0                                   | 2             | 4                           | 1                             |
| Mcmm3 | Olfir1289                  | 2   | 111.32      | olfactory receptor 1289                                                  | 7.65             | -        | 0                               | 0                            | 0                             | 0                                   | 1             | 4                           | 1                             |
| Mcmm3 | Zfp341                     | 2   | 154.44      | zinc finger protein 341                                                  | 35.47            | -        | 0                               | 0                            | 0                             | 0                                   | 2             | 4                           | 1                             |
| Mcmm3 | Cstf1                      | 2   | 172.2       | cleavage stimulation factor, 3' pre-RNA, subunit 1                       | 53.22            | 3.9      | 0                               | 0                            | 0                             | 0                                   | 0             | 3.7                         | 0                             |
| Mcmm3 | Lama5                      | 2   | 179.91      | laminin, alpha 5                                                         | 60.94            | -        | 2                               | 1                            | 0                             | 0                                   | 10            | 3.6                         | 1                             |
| Mcmm3 | Pofut1                     | 2   | 153.07      | protein O-fucosyltransferase 1                                           | 34.09            | 6.7      | 0                               | 0                            | 0                             | 0                                   | 0             | 3.4                         | 0                             |
| Mcmm3 | 8430427H17Rik              | 2   | 153.23      | RIKEN cDNA 8430427H17 gene                                               | 34.26            | 4.8      | 0                               | 0                            | 0                             | 0                                   | 0             | 3.4                         | 0                             |
| Mcmm3 | Dnmt3b                     | 2   | 153.48      | DNA methyltransferase 3B                                                 | 34.5             | 2.6      | 0                               | 0                            | 3                             | 4                                   | 0             | 3.4                         | 0                             |
| Mcmm3 | Pdrg1                      | 2   | 152.83      | p53 and DNA damage regulated 1                                           | 33.86            | 2.5      | 0                               | 0                            | 1                             | 1                                   | 0             | 3.4                         | 0                             |
| Mcmm3 | Bpifa2                     | 2   | 153.83      | BPI fold containing family A, member 2                                   | 34.86            | -        | 0                               | 0                            | 0                             | 0                                   | 12            | 3.4                         | 2                             |
| Mcmm3 | Sys1                       | 2   | 164.28      | SYS1 Golgi-localized integral membrane protein homolog (S. cerevisiae)   | 45.31            | 30.4     | 0                               | 0                            | 0                             | 0                                   | 0             | 3.2                         | 0                             |
| Mcmm3 | Snx21                      | 2   | 164.61      | sorting nexin family member 21                                           | 45.64            | 3.1      | 0                               | 0                            | 0                             | 0                                   | 0             | 3.2                         | 0                             |
| Mcmm3 | Acot8                      | 2   | 164.62      | acyl-CoA thioesterase 8                                                  | 45.64            | 2.6      | 0                               | 0                            | 0                             | 0                                   | 0             | 3.2                         | 0                             |
| Mcmm3 | Zfp663                     | 2   | 165.18      | zinc finger protein 663                                                  | 46.2             | -        | 0                               | 0                            | 0                             | 0                                   | 6             | 3.2                         | 2                             |
| Mcmm3 | Cd93                       | 2   | 148.26      | CD93 antigen                                                             | 29.29            | 6.5      | 2                               | 0                            | 0                             | 5                                   | 1             | 3.1                         | 1                             |
| Mcmm3 | Cst3                       | 2   | 148.7       | cystatin C                                                               | 29.72            | 2.9      | 45                              | 18                           | 2                             | 64                                  | 0             | 3.1                         | 0                             |
| Mcmm3 | Napb                       | 2   | 148.52      | N-ethylmaleimide sensitive fusion protein attachment protein beta        | 29.55            | 2.6      | 2                               | 1                            | 1                             | 0                                   | 0             | 3.1                         | 0                             |
| Mcmm3 | Cst11                      | 2   | 148.58      | cystatin-like 1                                                          | 29.6             | -        | 0                               | 0                            | 0                             | 0                                   | 1             | 3.1                         | 1                             |
| Mcmm3 | Snx5                       | 2   | 144.08      | sorting nexin 5                                                          | 25.1             | 8.2      | 0                               | 3                            | 0                             | 0                                   | 0             | 2.7                         | 0                             |
| Mcmm3 | Dstrn                      | 2   | 143.74      | destrin                                                                  | 24.77            | 6.1      | 0                               | 0                            | 1                             | 0                                   | 0             | 2.7                         | 0                             |
| Mcmm3 | Csrp2bp                    | 2   | 144.19      | cysteine and glycine-rich protein 2 binding protein                      | 25.22            | 3.3      | 0                               | 0                            | 0                             | 0                                   | 0             | 2.7                         | 0                             |
| Mcmm3 | Sec23b                     | 2   | 144.38      | SEC23B (S. cerevisiae)                                                   | 25.41            | 2.4      | 0                               | 0                            | 0                             | 0                                   | 0             | 2.7                         | 0                             |
| Mcmm3 | Kif16b                     | 2   | 142.44      | kinesin family member 16B                                                | 23.47            | -        | 1                               | 2                            | 0                             | 0                                   | 6             | 2.7                         | 1                             |
| Mcmm3 | MacroD2                    | 2   | 140.22      | MACRO domain containing 2                                                | 21.25            | -        | 0                               | 0                            | 0                             | 0                                   | 5             | 2.7                         | 3                             |
| Mcmm3 | Cd44                       | 2   | 102.65      | CD44 antigen                                                             | 16.32            | -        | 69                              | 78                           | 46                            | 79                                  | 3             | 2.3                         | 1                             |
| Mcmm3 | Chst1                      | 2   | 92.44       | carbohydrate (keratan sulfate Gal-6) sulfotransferase 1                  | 26.53            | 15.5     | 0                               | 0                            | 0                             | 0                                   | 0             | 2.1                         | 0                             |
| Mcmm3 | Slc35c1                    | 2   | 92.29       | solute carrier family 35, member C1                                      | 26.68            | 13.2     | 0                               | 0                            | 0                             | 0                                   | 0             | 2.1                         | 0                             |
| Mcmm3 | Kbtbd4                     | 2   | 90.74       | kelch repeat and BTB (POZ) domain containing 4                           | 28.23            | 12.9     | 0                               | 0                            | 0                             | 0                                   | 1             | 2.1                         | 0                             |
| Mcmm3 | Sfp1                       | 2   | 90.92       | SFFV proviral integration 1                                              | 28.05            | 5.6      | 0                               | 0                            | 0                             | 0                                   | 1             | 2.1                         | 0                             |
| Mcmm3 | Lrp4                       | 2   | 91.3        | low density lipoprotein receptor-related protein 4                       | 27.68            | 5.4      | 6                               | 1                            | 1                             | 3                                   | 0             | 2.1                         | 0                             |
| Mcmm3 | Acp2                       | 2   | 91.04       | acid phosphatase 2, lysosomal                                            | 27.93            | 5.2      | 1                               | 8                            | 1                             | 0                                   | 0             | 2.1                         | 0                             |

|       |           |    |        |                                                                               |        |      |     |     |     |     |    |     |   |
|-------|-----------|----|--------|-------------------------------------------------------------------------------|--------|------|-----|-----|-----|-----|----|-----|---|
| Mcmm3 | Ambra1    | 2  | 91.57  | autophagy/beclin 1 regulator 1                                                | 27.4   | 3.2  | 0   | 11  | 90  | 0   | 0  | 2.1 | 0 |
| Mcmm3 | Olf1241   | 2  | 89.32  | olfactory receptor 1241                                                       | 29.65  | -    | 0   | 0   | 0   | 0   | 1  | 2.1 | 1 |
| Mcmm3 | Olf52     | 2  | 86.02  | olfactory receptor 52                                                         | 32.95  | -    | 0   | 0   | 0   | 0   | 1  | 2.1 | 1 |
|       |           |    |        |                                                                               |        |      |     |     |     |     |    |     |   |
| Mcmm4 | Slain2    | 5  | 73.31  | SLAIN motif family, member 2                                                  | 32.14  | 3.8  | 0   | 0   | 0   | 0   | 0  | 5.7 | 0 |
| Mcmm4 | Sgcb      | 5  | 74.02  | sarcoglycan, beta (dystrophin-associated glycoprotein)                        | 31.42  | 3.1  | 0   | 0   | 0   | 0   | 0  | 5.7 | 0 |
| Mcmm4 | Srd5a3    | 5  | 76.57  | steroid 5 alpha-reductase 3                                                   | 28.87  | 9.7  | 0   | 0   | 0   | 0   | 1  | 5.7 | 0 |
| Mcmm4 | Cep135    | 5  | 77.02  | centrosomal protein 135                                                       | 28.42  | 5.3  | 0   | 0   | 0   | 0   | 0  | 5.7 | 0 |
| Mcmm4 | Epha5     | 5  | 84.49  | Eph receptor A5                                                               | 20.95  | -    | 0   | 0   | 0   | 0   | 2  | 5.7 | 1 |
| Mcmm4 | Cenpc1    | 5  | 86.44  | centromere protein C1                                                         | 19     | -    | 0   | 0   | 0   | 0   | 2  | 5.7 | 1 |
| Mcmm4 | Tmprss11g | 5  | 86.91  | transmembrane protease, serine 11g                                            | 18.53  | -    | 0   | 0   | 0   | 0   | 1  | 5.7 | 1 |
| Mcmm4 | Npffr2    | 5  | 89.96  | neuropeptide FF receptor 2                                                    | 15.48  | -    | 0   | 0   | 0   | 0   | 3  | 5.7 | 1 |
| Mcmm4 | Cox18     | 5  | 90.64  | COX18 cytochrome c oxidase assembly homolog (S. cerevisiae)                   | 14.8   | 6.6  | 0   | 0   | 0   | 0   | 3  | 5.7 | 1 |
| Mcmm4 | Ankrd17   | 5  | 90.66  | ankyrin repeat domain 17                                                      | 14.78  | 6.3  | 0   | 0   | 0   | 0   | 1  | 5.7 | 0 |
| Mcmm4 | Arhgap24  | 5  | 102.91 | Rho GTPase activating protein 24                                              | 2.53   | 4.7  | 0   | 0   | 1   | 0   | 0  | 5.7 | 0 |
| Mcmm4 | Ibsp      | 5  | 104.73 | integrin binding sialoprotein                                                 | 0.71   | -    | 1   | 0   | 2   | 2   | 6  | 5.7 | 2 |
| Mcmm4 | Mepe      | 5  | 104.75 | matrix extracellular phosphoglycoprotein with ASARM motif (bone)              | 0.69   | -    | 0   | 0   | 0   | 1   | 27 | 5.7 | 4 |
| Mcmm4 | Spp1      | 5  | 104.86 | secreted phosphoprotein 1                                                     | 0.58   | 6.9  | 29  | 7   | 6   | 82  | 0  | 5.7 | 0 |
| Mcmm4 | Pkd2      | 5  | 104.89 | polycystic kidney disease 2                                                   | 0.55   | 19.5 | 26  | 10  | 8   | 14  | 5  | 5.7 | 0 |
| Mcmm4 | Lrrc8c    | 5  | 105.95 | leucine rich repeat containing 8 family, member C                             | 0.51   | 5.7  | 0   | 0   | 0   | 0   | 0  | 5.7 | 0 |
| Mcmm4 | Lrrc8d    | 5  | 106.13 | leucine rich repeat containing 8D                                             | 0.69   | 4    | 0   | 0   | 0   | 0   | 0  | 5.7 | 0 |
|       |           |    |        |                                                                               |        |      |     |     |     |     |    |     |   |
| Mcmm5 | Apobec1   | 6  | 122.53 | apolipoprotein B mRNA editing enzyme, catalytic polypeptide 1                 | 2.4    | 7.9  | 44  | 3   | 1   | 31  | 0  | 4.1 | 0 |
| Mcmm5 | A2m       | 6  | 121.59 | alpha-2-macroglobulin                                                         | 1.46   | -    | 6   | 0   | 0   | 4   | 9  | 4.1 | 2 |
| Mcmm5 | Mug2      | 6  | 121.96 | murinoglobulin 2                                                              | 1.83   | -    | 0   | 0   | 0   | 0   | 1  | 4.1 | 1 |
| Mcmm5 | Bid       | 6  | 120.84 | BH3 interacting domain death agonist                                          | 0.71   | 6.4  | 168 | 73  | 74  | 59  | 0  | 3.5 | 0 |
| Mcmm5 | Atp6v1e1  | 6  | 120.75 | ATPase, H+ transporting, lysosomal V1 subunit E1                              | 0.61   | 8.4  | 0   | 3   | 1   | 0   | 0  | 3.5 | 0 |
|       |           |    |        |                                                                               |        |      |     |     |     |     |    |     |   |
| Mcmm6 | Fli1      | 9  | 32.23  | Friend leukemia integration 1                                                 | 0.53   | 15.7 | 3   | 2   | 0   | 4   | 0  | 5.3 | 0 |
| Mcmm6 | Casp1     | 9  | 5.3    | caspase 1                                                                     | 26.4   | 5.1  | 104 | 104 | 139 | 121 | 0  | 4.6 | 0 |
| Mcmm6 | Bbs9      | 9  | 22.28  | Bardet-Biedl syndrome 9 (human)                                               | 9.42   | 2.7  | 0   | 0   | 0   | 0   | 0  | 4.4 | 0 |
| Mcmm6 | Casp1     | 9  | 5.3    | caspase 1                                                                     | 26.4   | 5.1  | 104 | 104 | 139 | 121 | 0  | 4.6 | 0 |
| Mcmm6 | Bbs9      | 9  | 22.28  | Bardet-Biedl syndrome 9 (human)                                               | 9.42   | 2.7  | 0   | 0   | 0   | 0   | 0  | 4.4 | 0 |
|       |           |    |        |                                                                               |        |      |     |     |     |     |    |     |   |
| Mcmm7 | Obfc2b    | 10 | 127.84 | oligonucleotide/oligosaccharide-binding fold containing 2B                    | 0.31   | 4.9  | 0   | 0   | 0   | 0   | 0  | 4.6 | 0 |
| Mcmm7 | Cdk2      | 10 | 128.13 | cyclin-dependent kinase 2                                                     | 0.61   | 2.8  | 22  | 4   | 36  | 56  | 0  | 4.6 | 0 |
| Mcmm7 | Atp5b     | 10 | 127.52 | ATP synthase, H+ transporting mitochondrial F1 complex, beta subunit          | 0      | 2.6  | 7   | 1   | 3   | 5   | 0  | 4.6 | 0 |
| Mcmm7 | Olf822    | 10 | 129.51 | olfactory receptor 822                                                        | 1.99   | -    | 0   | 0   | 0   | 0   | 1  | 4.6 | 1 |
| Mcmm7 | Tbk1      | 10 | 120.98 | TANK-binding kinase 1                                                         | 6.54   | 7.3  | 5   | 8   | 64  | 8   | 0  | 4.5 | 0 |
| Mcmm7 | Tmem5     | 10 | 121.52 | transmembrane protein 5                                                       | 6.01   | 3.3  | 0   | 0   | 0   | 0   | 0  | 4.5 | 0 |
| Mcmm7 | Os9       | 10 | 126.53 | amplified in osteosarcoma                                                     | 0.99   | 7.4  | 0   | 2   | 1   | 0   | 2  | 4.2 | 0 |
| Mcmm7 | Mars      | 10 | 126.73 | methionine-tRNA synthetase                                                    | 0.79   | 5.9  | 53  | 0   | 2   | 33  | 1  | 4.2 | 0 |
| Mcmm7 | Ndufa4l2  | 10 | 126.95 | NADH dehydrogenase (ubiquinone) 1 alpha subcomplex, 4-like 2                  | 0.57   | 3.2  | 0   | 0   | 2   | 0   | 0  | 4.2 | 0 |
| Mcmm7 | Mett11    | 10 | 126.48 | methyltransferase like 1                                                      | 1.05   | 2.6  | 0   | 0   | 0   | 0   | 1  | 4.2 | 0 |
| Mcmm7 | Cdk4      | 10 | 126.5  | cyclin-dependent kinase 4                                                     | 1.02   | 2.6  | 14  | 6   | 33  | 44  | 0  | 4.2 | 0 |
| Mcmm7 | Nab2      | 10 | 127.1  | Ngfi-A binding protein 2                                                      | 0.43   | 2.5  | 0   | 0   | 0   | 3   | 0  | 4.2 | 0 |
| Mcmm7 | Reps1     | 10 | 17.78  | RalBP1 associated Eps domain containing protein                               | 109.75 | 4.4  | 0   | 0   | 0   | 0   | 1  | 3   | 0 |
| Mcmm7 | Mum1      | 10 | 79.69  | melanoma associated antigen (mutated) 1                                       | 47.83  | 3.3  | 0   | 0   | 0   | 0   | 0  | 3   | 0 |
| Mcmm7 | Hcn2      | 10 | 79.18  | hyperpolarization-activated, cyclic nucleotide-gated K+ 2                     | 48.34  | -    | 4   | 1   | 1   | 1   | 1  | 3   | 1 |
| Mcmm7 | Sf3b5     | 10 | 12.73  | splicing factor 3b, subunit 5                                                 | 114.8  | 19.2 | 0   | 0   | 0   | 0   | 0  | 2.9 | 0 |
| Mcmm7 | Aig1      | 10 | 13.37  | androgen-induced 1                                                            | 114.16 | 3.1  | 0   | 1   | 0   | 0   | 3  | 2.9 | 0 |
| Mcmm7 | Phactr2   | 10 | 12.93  | phosphatase and actin regulator 2                                             | 114.59 | -    | 0   | 0   | 0   | 0   | 5  | 2.9 | 1 |
| Mcmm7 | Utrn      | 10 | 12.1   | utrophin                                                                      | 115.42 | -    | 0   | 0   | 0   | 1   | 1  | 2.9 | 1 |
| Mcmm7 | Apa3      | 10 | 80.73  | amyloid beta (A4) precursor protein-binding, family A, member 3               | 46.79  | 2.5  | 0   | 1   | 0   | 0   | 0  | 2.8 | 0 |
| Mcmm7 | Hmg20b    | 10 | 80.81  | high mobility group 20 B                                                      | 46.72  | 2.5  | 0   | 0   | 0   | 0   | 0  | 2.8 | 0 |
| Mcmm7 | Gm6713    | 10 | 85.17  | predicted gene 6713                                                           | 42.35  | -    | 0   | 0   | 0   | 0   | 0  | 2.8 | 2 |
| Mcmm7 | Fam26e    | 10 | 33.81  | family with sequence similarity 26, member E                                  | 93.71  | 3.8  | 0   | 0   | 0   | 0   | 0  | 2.7 | 0 |
| Mcmm7 | Ifngr1    | 10 | 19.31  | interferon gamma receptor 1                                                   | 108.21 | 2.7  | 1   | 0   | 1   | 3   | 1  | 2.7 | 0 |
| Mcmm7 | Stx7      | 10 | 23.87  | syntaxin 7                                                                    | 103.65 | 3.5  | 0   | 3   | 1   | 0   | 0  | 2.6 | 0 |
| Mcmm7 | Il22ra2   | 10 | 19.34  | interleukin 22 receptor, alpha 2                                              | 108.18 | -    | 0   | 0   | 0   | 0   | 2  | 2.6 | 1 |
| Mcmm7 | Taar1     | 10 | 23.64  | trace amine-associated receptor 1                                             | 103.88 | -    | 0   | 0   | 0   | 0   | 1  | 2.6 | 1 |
| Mcmm7 | Slc25a3   | 10 | 90.58  | solute carrier family 25 (mitochondrial carrier, phosphate carrier), member 3 | 36.94  | 12.6 | 0   | 0   | 0   | 0   | 0  | 1.9 | 0 |
| Mcmm7 | Gnptab    | 10 | 87.84  | N-acetylglucosamine-1-phosphate transferase, alpha and beta subunits          | 39.68  | 14.3 | 2   | 33  | 0   | 0   | 4  | 1.8 | 0 |
| Mcmm7 | Chpt1     | 10 | 87.92  | choline phosphotransferase 1                                                  | 39.61  | 9.6  | 1   | 0   | 0   | 0   | 0  | 1.8 | 0 |
| Mcmm7 | Stab2     | 10 | 86.3   | stabilin 2                                                                    | 41.22  | 5.8  | 0   | 2   | 0   | 3   | 15 | 1.8 | 1 |
| Mcmm7 | Utp20     | 10 | 88.21  | UTP20, small subunit (SSU) processome component, homolog (yeast)              | 39.31  | -    | 0   | 0   | 0   | 0   | 3  | 1.8 | 1 |
| Mcmm7 | Fgd6      | 10 | 93.5   | FYVE, RhoGEF and PH domain containing 6                                       | 34.03  | 20   | 1   | 0   | 0   | 0   | 0  | 1.7 | 0 |
| Mcmm7 | Vezt      | 10 | 93.4   | vezatin, adherens junctions transmembrane protein                             | 34.12  | 10.5 | 0   | 0   | 0   | 0   | 0  | 1.7 | 0 |
| Mcmm7 | Hal       | 10 | 92.95  | histidine ammonia lyase                                                       | 34.57  | 9.2  | 23  | 0   | 2   | 7   | 0  | 1.7 | 0 |

|        |               |    |        |                                                                                |       |      |     |     |     |     |    |     |   |
|--------|---------------|----|--------|--------------------------------------------------------------------------------|-------|------|-----|-----|-----|-----|----|-----|---|
| Mcmm7  | Elk3          | 10 | 92.71  | ELK3, member of ETS oncogene family                                            | 34.81 | 3.7  | 0   | 0   | 1   | 0   | 0  | 1.7 | 0 |
| Mcmm7  | Zfc3h1        | 10 | 114.82 | zinc finger, C3H1-type containing                                              | 12.7  | 3    | 1   | 0   | 0   | 0   | 0  | 0.8 | 0 |
| Mcmm7  | Tph2          | 10 | 114.52 | tryptophan hydroxylase 2                                                       | 13.01 | -    | 3   | 0   | 0   | 0   | 1  | 0.8 | 1 |
| Mcmm7  | Mdm1          | 10 | 117.58 | transformed mouse 3T3 cell double minute 1                                     | 9.95  | 3    | 0   | 1   | 0   | 0   | 1  | 0.4 | 0 |
| Mcmm7  | Slc35e3       | 10 | 117.17 | solute carrier family 35, member E3                                            | 10.35 | 2.8  | 0   | 0   | 0   | 0   | 0  | 0.4 | 0 |
| Mcmm7  | Nup107        | 10 | 117.19 | nucleoporin 107                                                                | 10.34 | 2.4  | 0   | 0   | 0   | 0   | 0  | 0.4 | 0 |
| Mcmm7  | Otogl         | 10 | 107.2  | otogelin-like                                                                  | 20.32 | -    | 0   | 0   | 0   | 0   | 3  | 0.2 | 1 |
| Mcmm8  | 4930415F15Rik | 11 | 11.36  | RIKEN cDNA 4930415F15 gene                                                     | 4.09  | -    | 0   | 0   | 0   | 0   | 1  | 6   | 1 |
| Mcmm8  | Myo1g         | 11 | 6.41   | myosin IG                                                                      | 0.87  | -    | 0   | 1   | 1   | 0   | 2  | 6   | 1 |
| Mcmm8  | Npc1l1        | 11 | 6.11   | NPC1-like 1                                                                    | 1.16  | -    | 395 | 4   | 2   | 61  | 2  | 6   | 1 |
| Mcmm8  | Pkd1l1        | 11 | 8.73   | polycystic kidney disease 1 like 1                                             | 1.45  | -    | 0   | 0   | 0   | 1   | 1  | 6   | 1 |
| Mcmm8  | Camk2b        | 11 | 5.87   | calcium/calmodulin-dependent protein kinase II, beta                           | 1.4   | 24.8 | 1   | 0   | 0   | 0   | 0  | 6   | 0 |
| Mcmm8  | Ccm2          | 11 | 6.45   | cerebral cavernous malformation 2 homolog (human)                              | 0.83  | 9.5  | 0   | 0   | 3   | 0   | 0  | 6   | 0 |
| Mcmm8  | Ascc2         | 11 | 4.54   | activating signal cointegrator 1 complex subunit 2                             | 2.74  | 5.5  | 0   | 0   | 0   | 0   | 0  | 6   | 0 |
| Mcmm8  | Nipsnap1      | 11 | 4.77   | 4-nitrophenylphosphatase domain and non-neuronal SNAP25-like protein homolog 1 | 2.5   | 3.9  | 0   | 0   | 1   | 1   | 0  | 6   | 0 |
| Mcmm8  | Figln1        | 11 | 11.69  | figletin-like 1                                                                | 4.41  | 3.5  | 0   | 0   | 0   | 0   | 1  | 6   | 0 |
| Mcmm8  | Aebp1         | 11 | 5.76   | AE binding protein 1                                                           | 1.51  | 2.8  | 6   | 0   | 0   | 5   | 0  | 6   | 0 |
| Mcmm8  | Osm           | 11 | 4.14   | oncostatin M                                                                   | 3.14  | 2.4  | 27  | 11  | 3   | 24  | 0  | 6   | 0 |
| Mcmm8  | Il9r          | 11 | 32.09  | interleukin 9 receptor                                                         | 24.81 | -    | 0   | 0   | 0   | 1   | 10 | 4.6 | 1 |
| Mcmm8  | Spred2        | 11 | 19.82  | sprouty-related, EVH1 domain containing 2                                      | 12.55 | 10.8 | 0   | 1   | 1   | 1   | 0  | 4.2 | 0 |
| Mcmm8  | Vrk2          | 11 | 26.37  | vaccinia related kinase 2                                                      | 19.1  | 8.9  | 0   | 0   | 1   | 0   | 3  | 4.2 | 0 |
| Mcmm8  | Etaa1         | 11 | 17.84  | Ewing's tumor-associated antigen 1                                             | 10.57 | 7.3  | 0   | 0   | 0   | 0   | 2  | 4.2 | 0 |
| Mcmm8  | Psmc4         | 11 | 30.67  | proteasome (prosome, macropain) activator subunit 4                            | 23.4  | 5.8  | 0   | 0   | 1   | 0   | 0  | 4.2 | 0 |
| Mcmm8  | Ehbp1         | 11 | 21.91  | EH domain binding protein 1                                                    | 14.63 | 3.5  | 2   | 0   | 1   | 0   | 1  | 4.2 | 0 |
| Mcmm8  | Egfr          | 11 | 16.65  | epidermal growth factor receptor                                               | 9.38  | 2.6  | 755 | 298 | 234 | 508 | 0  | 4.2 | 0 |
| Mcmm8  | Peli1         | 11 | 20.99  | pellino 1                                                                      | 13.72 | 2.6  | 0   | 0   | 0   | 0   | 0  | 4.2 | 0 |
| Mcmm8  | Ugp2          | 11 | 21.22  | UDP-glucose pyrophosphorylase 2                                                | 13.95 | 2.5  | 0   | 0   | 0   | 0   | 0  | 4.2 | 0 |
| Mcmm8  | Comm1         | 11 | 22.73  | COMM domain containing 1                                                       | 15.46 | 2.5  | 5   | 1   | 0   | 0   | 0  | 4.2 | 0 |
| Mcmm9  | Gtf2a1        | 12 | 92.79  | general transcription factor II A, 1                                           | 2.81  | -    | 1   | 0   | 0   | 0   | 1  | 5.7 | 1 |
| Mcmm9  | Mpp5          | 12 | 79.85  | membrane protein, palmitoylated 5 (MAGUK p55 subfamily member 5)               | 15.75 | 2.8  | 0   | 0   | 0   | 0   | 1  | 4.9 | 0 |
| Mcmm9  | Slc10a1       | 12 | 82.05  | solute carrier family 10 (sodium/bile acid cotransporter family), member 1     | 13.55 | -    | 12  | 0   | 0   | 0   | 1  | 4.9 | 1 |
| Mcmm10 | Dync2li1      | 17 | 85.03  | dynein cytoplasmic 2 light intermediate chain 1                                | 3.53  | 22.8 | 0   | 0   | 0   | 0   | 1  | 5.3 | 0 |
| Mcmm10 | Lrpprc        | 17 | 85.1   | leucine-rich PPR-motif containing                                              | 3.46  | 7.3  | 1   | 3   | 10  | 1   | 5  | 5.3 | 0 |
| Mcmm10 | Pigf          | 17 | 87.4   | phosphatidylinositol glycan anchor biosynthesis, class F                       | 1.16  | 2.7  | 3   | 0   | 0   | 6   | 1  | 5.3 | 0 |
| Mcmm10 | Ttc7          | 17 | 87.68  | tetratricopeptide repeat domain 7                                              | 0.88  | 2.6  | 0   | 0   | 0   | 0   | 0  | 5.3 | 0 |
| Mcmm10 | Msh6          | 17 | 88.37  | mutS homolog 6 (E. coli)                                                       | 0.19  | -    | 1   | 0   | 2   | 0   | 2  | 5.3 | 1 |
| Mcmm10 | Fez2          | 17 | 78.77  | fasciculation and elongation protein zeta 2 (zygin II)                         | 9.79  | 3.7  | 0   | 1   | 1   | 0   | 0  | 4.9 | 0 |
| Mcmm10 | Heatr5b       | 17 | 79.15  | HEAT repeat containing 5B                                                      | 9.41  | -    | 0   | 0   | 0   | 0   | 2  | 4.9 | 1 |
| Mcmm10 | Vit           | 17 | 78.91  | vitron                                                                         | 9.65  | -    | 102 | 19  | 9   | 36  | 11 | 4.9 | 1 |
| Mcmm10 | Mta3          | 17 | 84.11  | metastasis associated 3                                                        | 4.45  | 4.3  | 1   | 0   | 0   | 1   | 2  | 4.8 | 0 |
| Mcmm10 | Thada         | 17 | 84.59  | thyroid adenoma associated                                                     | 3.97  | -    | 4   | 0   | 0   | 0   | 14 | 4.8 | 1 |
| Mcmm10 | Pleckhh2      | 17 | 84.91  | pleckstrin homology domain containing, family H (with MyTH4 domain) member 2   | 3.65  | -    | 0   | 0   | 1   | 0   | 11 | 4.8 | 2 |
| Mcmm10 | Pkdcc         | 17 | 83.61  | protein kinase domain containing, cytoplasmic                                  | 4.95  | 10.8 | 0   | 0   | 0   | 0   | 2  | 4.5 | 0 |
| Mcmm10 | Hnrpll        | 17 | 80.43  | heterogeneous nuclear ribonucleoprotein L-like                                 | 8.13  | 6.6  | 0   | 0   | 0   | 0   | 1  | 4   | 0 |
| Mcmm10 | Galm          | 17 | 80.53  | galactose mutarotase                                                           | 8.03  | 4.9  | 1   | 0   | 0   | 0   | 2  | 4   | 0 |
| Mcmm10 | Srsf7         | 17 | 80.6   | serine/arginine-rich splicing factor 7                                         | 7.96  | 3.1  | 0   | 0   | 0   | 0   | 0  | 4   | 0 |
| Mcmm10 | Fam179a       | 17 | 72.02  | family with sequence similarity 179, member A                                  | 16.54 | -    | 0   | 0   | 0   | 0   | 5  | 3.7 | 1 |
| Mcmm10 | Myom1         | 17 | 71.37  | myomesin 1                                                                     | 17.19 | -    | 0   | 0   | 0   | 0   | 5  | 3.7 | 1 |

<sup>a</sup>, Number of PubMed results for gene name AND listed subject term

<sup>b</sup>, While these genes did not meet our eQTL or PROVEAN criteria, these are the only 3 genes in this interval

Yellow highlighting denotes our top candidate genes at each QTL

**Supplemental Table IV. All amino acid variants determined to be "deleterious" by PROVEAN for Mcmm QTLs compared to reference allele**

| QTL Locus | Gene      | Chr | Mb Position | dbSNP       | Protein Accession | Reference allele | AKR/J allele | DBA/2J allele  | AA Variant | PROVEAN Score |
|-----------|-----------|-----|-------------|-------------|-------------------|------------------|--------------|----------------|------------|---------------|
| Mcmm3     | Zfp663    | 2   | 165.18      | rs28245427  | NP_001005425.1    | A                | G            | - <sup>a</sup> | H444Q      | -6.03         |
| Mcmm3     | Pla2g4f   | 2   | 120.13      | rs27459550  | NP_001019316.1    | C                | A            | -              | D507Y      | -6.02         |
| Mcmm3     | Aqr       | 2   | 113.97      | rs28271968  | NP_033832.2       | G                | A            | -              | P346S      | -5.09         |
| Mcmm3     | Macro2    | 2   | 140.25      | rs50246652  | NP_082663.1       | G                | -            | T              | V66F       | -5.00         |
| Mcmm3     | Spnb5     | 2   | 119.90      | rs223277097 | XP_006500600.1    | T                | C            | -              | E1184G     | -4.92         |
| Mcmm3     | Fbn1      | 2   | 125.21      | rs27452005  | NP_032019.2       | C                | -            | T              | D492N      | -4.66         |
| Mcmm3     | Olfr1241  | 2   | 89.32       | rs232833676 | NP_666666.1       | T                | C            | -              | T237A      | -4.59         |
| Mcmm3     | Zfyve19   | 2   | 119.04      | rs33333368  | NP_001158299.1    | C                | T            | -              | P164L      | -4.41         |
| Mcmm3     | Olfr1289  | 2   | 111.32      | rs27464429  | NP_666516.1       | T                | G            | -              | L9R        | -4.28         |
| Mcmm3     | Zfp341    | 2   | 154.46      | rs13476853  | NP_955008.2       | A                | -            | G              | D439G      | -4.22         |
| Mcmm3     | Spnb5     | 2   | 119.90      | rs27441671  | XP_006500600.1    | G                | T            | -              | A1059D     | -4.18         |
| Mcmm3     | Macro2    | 2   | 140.25      | rs27219685  | NP_082663.1       | A                | -            | G              | Q55R       | -4.00         |
| Mcmm3     | Macro2    | 2   | 140.25      | rs48383988  | NP_082663.1       | G                | -            | T              | L63F       | -4.00         |
| Mcmm3     | Lbp       | 2   | 158.15      | rs27303831  | NP_032515.2       | T                | C            | -              | Y284H      | -3.96         |
| Mcmm3     | Cd44      | 2   | 102.67      | rs29864230  | NP_001034239.1    | G                | -            | A              | H361Y      | -3.53         |
| Mcmm3     | Spnb5     | 2   | 119.89      | rs46195182  | XP_006500600.1    | T                | A            | -              | Q1584L     | -3.48         |
| Mcmm3     | Spnb5     | 2   | 119.91      | rs250549899 | XP_006500600.1    | C                | A            | -              | Q409H      | -3.33         |
| Mcmm3     | Spnb5     | 2   | 119.87      | rs27457713  | XP_006500600.1    | C                | T            | -              | E3148K     | -3.31         |
| Mcmm3     | Pla2g4f   | 2   | 120.13      | rs27459553  | NP_001019316.1    | G                | A            | -              | A526V      | -3.25         |
| Mcmm3     | Lama5     | 2   | 179.93      | rs29578434  | NP_001074640.1    | C                | -            | T              | D1058N     | -3.23         |
| Mcmm3     | Epb4.2    | 2   | 120.85      | rs27422960  | NP_038541.1       | A                | -            | T              | C398S      | -3.11         |
| Mcmm3     | Bpi       | 2   | 158.09      | rs48239330  | NP_808518.1       | G                | -            | A              | D149N      | -3.00         |
| Mcmm3     | Cst11     | 2   | 148.58      | rs28210804  | NP_808323.1       | C                | -            | T              | T99M       | -2.90         |
| Mcmm3     | Olfr52    | 2   | 86.02       | rs28028940  | NP_666794.1       | C                | -            | A              | D299Y      | -2.88         |
| Mcmm3     | Nusap1    | 2   | 119.45      | rs33363555  | NP_001036117.1    | C                | -            | T              | T85M       | -2.83         |
| Mcmm3     | Kif16b    | 2   | 142.54      | rs27203630  | NP_001074602.1    | T                | -            | C              | D929G      | -2.80         |
| Mcmm3     | Casc5     | 2   | 118.90      | rs27471478  | NP_083893.2       | A                | T            | -              | K967N      | -2.80         |
| Mcmm3     | Zfp663    | 2   | 165.18      | rs253362248 | NP_001005425.1    | C                | G            | -              | G446A      | -2.75         |
| Mcmm3     | Olfr1290  | 2   | 111.33      | rs27464412  | NP_001265716.1    | G                | C            | -              | L17V       | -2.74         |
| Mcmm3     | Spnb5     | 2   | 119.91      | rs27441617  | XP_006500600.1    | T                | C            | -              | H91R       | -2.72         |
| Mcmm3     | Cd93      | 2   | 148.27      | rs29880912  | NP_034870.1       | T                | -            | G              | N264H      | -2.71         |
| Mcmm3     | Ganc      | 2   | 120.25      | rs27443939  | NP_766260.2       | C                | T            | -              | T90I       | -2.63         |
| Mcmm3     | Bpifa2    | 2   | 153.84      | rs27347441  | NP_032979.1       | A                | -            | G              | S212G      | -2.57         |
| Mcmm3     | Bpifa2    | 2   | 153.84      | rs242278248 | NP_032979.1       | C                | -            | A              | P178H      | -2.53         |
| Mcmm3     | Tmem62    | 2   | 120.82      | rs27423047  | NP_780494.1       | T                | -            | C              | V393A      | -2.50         |
|           |           |     |             |             |                   |                  |              |                |            |               |
| Mcmm4     | lbsp      | 5   | 104.74      | rs49148059  | NP_032344.2       | G                | -            | T              | G197V      | -5.96         |
| Mcmm4     | Mepe      | 5   | 104.77      | rs49877953  | NP_444402.2       | G                | -            | A              | G271S      | -5.26         |
| Mcmm4     | Mepe      | 5   | 104.77      | rs46782475  | NP_444402.2       | C                | -            | T              | S313L      | -4.84         |
| Mcmm4     | Epha5     | 5   | 84.54       | rs33093662  | NP_031963.2       | G                | -            | A              | R532C      | -4.09         |
| Mcmm4     | lbsp      | 5   | 104.74      | rs52386424  | NP_032344.2       | G                | -            | A              | G143E      | -3.50         |
| Mcmm4     | Npffr2    | 5   | 90.00       | rs33223269  | NP_573455.2       | T                | -            | C              | I89T       | -3.37         |
| Mcmm4     | Mepe      | 5   | 104.77      | rs51820957  | NP_444402.2       | C                | -            | A              | S267R      | -3.19         |
| Mcmm4     | Tmprss11g | 5   | 86.92       | rs31680434  | NP_796136.2       | T                | -            | C              | T238A      | -3.16         |
| Mcmm4     | Mepe      | 5   | 104.77      | rs47716354  | NP_444402.2       | T                | -            | C              | L371P      | -3.04         |
| Mcmm4     | Cenpc1    | 5   | 86.47       | rs31660491  | NP_031709.2       | T                | -            | G              | K418T      | -3.01         |
| Mcmm4     | Cox18     | 5   | 90.65       | rs31692127  | NP_001028482.2    | A                | -            | G              | Y252H      | -2.58         |
|           |           |     |             |             |                   |                  |              |                |            |               |
| Mcmm5     | Mug2      | 6   | 122.03      | rs30427541  | NP_032672.2       | C                | -            | A              | H1064Q     | -7.31         |
| Mcmm5     | A2m       | 6   | 121.61      | rs30949689  | NP_783327.2       | C                | -            | A              | T898K      | -5.88         |
| Mcmm5     | A2m       | 6   | 121.62      | rs50350755  | NP_783327.2       | A                | C            | -              | E1173A     | -4.70         |
|           |           |     |             |             |                   |                  |              |                |            |               |
| Mcmm7     | Tph2      | 10  | 114.52      | rs33849125  | NP_775567.2       | G                | -            | C              | P447R      | -7.75         |
| Mcmm7     | Taar1     | 10  | 23.64       | rs33645709  | NP_444435.1       | C                | -            | A              | P77T       | -7.55         |
| Mcmm7     | Stab2     | 10  | 86.40       | rs48050828  | NP_619614.1       | C                | -            | T              | G864D      | -6.29         |
| Mcmm7     | Hcn2      | 10  | 79.19       | rs247436022 | NP_032252.1       | C                | T            | -              | R261C      | -5.54         |
| Mcmm7     | Utrn      | 10  | 12.41       | rs249408076 | NP_035812.3       | G                | A            | -              | P1283L     | -5.14         |
| Mcmm7     | Otogl     | 10  | 107.21      | rs30631797  | NP_001171038.1    | T                | -            | C              | N2170S     | -4.57         |
| Mcmm7     | Gm6713    | 10  | 85.17       | rs107765457 | XP_006514427.1    | A                | -            | T              | I178K      | -4.34         |

|        |               |    |        |             |                |   |   |   |        |       |
|--------|---------------|----|--------|-------------|----------------|---|---|---|--------|-------|
| Mcmm7  | Olf822        | 10 | 129.51 | rs216067757 | NP_666882.1    | C | T | - | S249L  | -4.32 |
| Mcmm7  | Gm6713        | 10 | 85.17  | rs237987689 | XP_006514427.1 | C | - | T | D185N  | -4.24 |
| Mcmm7  | Il22ra2       | 10 | 19.34  | rs46108038  | NP_839989.2    | C | T | - | P30L   | -3.95 |
| Mcmm7  | Utp20         | 10 | 88.24  | rs50984008  | NP_780367.2    | G | A | - | P1225S | -3.10 |
| Mcmm7  | Phactr2       | 10 | 12.98  | rs33593279  | NP_001028429.1 | G | - | T | S217Y  | -2.56 |
|        |               |    |        |             |                |   |   |   |        |       |
| Mcmm8  | Myo1g         | 11 | 6.41   | rs6153562   | NP_848534.2    | T | C | - | H467R  | -4.62 |
| Mcmm8  | Il9r          | 11 | 32.09  | rs48507356  | NP_001127930.1 | G | - | A | S68L   | -4.37 |
| Mcmm8  | Npc1l1        | 11 | 6.13   | rs26899815  | NP_997125.2    | C | A | - | G226C  | -3.13 |
| Mcmm8  | Pkd1l1        | 11 | 8.85   | rs29405661  | XP_011242102.1 | A | - | G | F602L  | -2.97 |
| Mcmm8  | 4930415F15Rik | 11 | 11.41  | rs213396354 | NP_082945.1    | G | T | - | R116I  | -2.65 |
|        |               |    |        |             |                |   |   |   |        |       |
| Mcmm9  | Gtf2a1        | 12 | 92.80  | rs29163189  | NP_113568.2    | A | - | G | Y367H  | -3.30 |
| Mcmm9  | Slc10a1       | 12 | 82.06  | rs245884573 | NP_001171032.1 | T | A | - | I279F  | -3.29 |
|        |               |    |        |             |                |   |   |   |        |       |
| Mcmm10 | Heatr5b       | 17 | 79.19  | rs49687971  | NP_001074648.1 | T | C | - | D1294G | -6.10 |
| Mcmm10 | Msh6          | 17 | 88.38  | rs261524856 | NP_034960.1    | C | T | - | R384C  | -5.22 |
| Mcmm10 | Thada         | 17 | 84.84  | rs29751673  | NP_898842.2    | G | - | A | S675L  | -3.63 |
| Mcmm10 | Plekhh2       | 17 | 84.97  | rs29751293  | NP_808274.2    | C | - | T | S681L  | -3.01 |
| Mcmm10 | Myom1         | 17 | 71.45  | rs47080265  | NP_001077403.1 | T | - | A | D1100E | -2.96 |
| Mcmm10 | Fam179a       | 17 | 72.07  | rs33161731  | NP_796061.2    | G | - | A | V783M  | -2.78 |
| Mcmm10 | Vit           | 17 | 79.00  | rs45906836  | NP_001183957.1 | A | G | - | S253G  | -2.70 |
| Mcmm10 | Plekhh2       | 17 | 84.96  | rs108355503 | NP_808274.2    | A | - | T | Q167H  | -2.50 |

<sup>a</sup>, denotes identical to the reference allele



**Supplemental Table V. *Mcm* QTL genes cross-referenced against the human GWAS catalog for atherosclerosis relevant traits**

| Locus  | Gene     | Chr | PMID     | Disease Trait                                                      |
|--------|----------|-----|----------|--------------------------------------------------------------------|
| Mcmm1  | Cacna1e  | 1   | 23870195 | Coronary artery calcification                                      |
| Mcmm1  | Cacna1e  | 1   | 27098658 | Presence of antiphospholipid antibodies                            |
| Mcmm3  | Cst3     | 2   | 24952865 | Plasma cystatin c levels in acute coronary syndrome                |
| Mcmm3  | Cst3     | 2   | 24952865 | Plasma cystatin c levels in acute coronary syndrome                |
| Mcmm3  | Dstn     | 2   | 23509613 | Presence of antiphospholipid antibodies                            |
| Mcmm3  | Lrp4     | 2   | 24097068 | HDL cholesterol                                                    |
| Mcmm3  | Lrp4     | 2   | 20686565 | HDL cholesterol                                                    |
| Mcmm3  | Lrp4     | 2   | 28334899 | HDL cholesterol levels                                             |
| Mcmm3  | Macrocl2 | 2   | 27098658 | Presence of antiphospholipid antibodies                            |
| Mcmm3  | Macrocl2 | 2   | 23509613 | Presence of antiphospholipid antibodies                            |
| Mcmm3  | Macrocl2 | 2   | 27098658 | Presence of antiphospholipid antibodies                            |
| Mcmm3  | Snx5     | 2   | 25961943 | Cholesterol, total                                                 |
| Mcmm3  | Snx5     | 2   | 25961943 | LDL cholesterol                                                    |
| Mcmm3  | Snx5     | 2   | 24097068 | LDL cholesterol                                                    |
| Mcmm3  | Snx5     | 2   | 28334899 | LDL cholesterol levels                                             |
| Mcmm4  | Mepe     | 5   | 21779381 | Cardiovascular disease risk factors                                |
| Mcmm5  | Apobec1  | 6   | 28334899 | HDL cholesterol levels                                             |
| Mcmm7  | Stab2    | 10  | 21878436 | Coronary restenosis                                                |
| Mcmm7  | Utp20    | 10  | 17903303 | Coronary artery calcification                                      |
| Mcmm8  | Camk2b   | 11  | 22399527 | Metabolic syndrome                                                 |
| Mcmm8  | Ehbp1    | 11  | 24097068 | LDL cholesterol                                                    |
| Mcmm8  | Ehbp1    | 11  | 28334899 | LDL cholesterol levels                                             |
| Mcmm8  | Npc111   | 11  | 25961943 | Cholesterol, total                                                 |
| Mcmm8  | Npc111   | 11  | 20686565 | Cholesterol, total                                                 |
| Mcmm8  | Npc111   | 11  | 24097068 | Cholesterol, total                                                 |
| Mcmm8  | Npc111   | 11  | 25961943 | LDL cholesterol                                                    |
| Mcmm8  | Npc111   | 11  | 20686565 | LDL cholesterol                                                    |
| Mcmm8  | Npc111   | 11  | 24097068 | LDL cholesterol                                                    |
| Mcmm8  | Npc111   | 11  | 28334899 | LDL cholesterol levels                                             |
| Mcmm8  | Npc111   | 11  | 28334899 | Total cholesterol levels                                           |
| Mcmm8  | Peli1    | 11  | 21221998 | Kawasaki disease                                                   |
| Mcmm10 | Dync2li1 | 17  | 27286809 | C-reactive protein levels or total cholesterol levels (pleiotropy) |

## Reference List

- (1) Yalcin B, Wong K, Agam A, et. al. Sequence-based characterization of structural variation in the mouse genome. *Nature* 2011;477:326-9.
- (2) Schurks M, Buring JE, Ridker PM, Chasman DI, Kurth T. Genetic determinants of cardiovascular events among women with migraine: a genome-wide association study. *PLoS One* 2011;6:e22106.
- (3) Yu L, Nian Z, Sang J. Osteosarcoma amplified 9 is highly expressed in mouse adipocytes and controls lipid storage. *Mol Med Rep* 2011;4:687-92.
- (4) Kristiansson K, Perola M, Tikkanen E, et.al. Genome-wide screen for metabolic syndrome susceptibility Loci reveals strong lipid gene contribution but no evidence for common genetic basis for clustering of metabolic syndrome traits. *Circ Cardiovasc Genet* 2012;5:242-9.
- (5) Ligthart S, Vaez A, Hsu YH, Stolk R, Uitterlinden AG, Hofman A, Alizadeh BZ, Franco OH, Dehghan A. Bivariate genome-wide association study identifies novel pleiotropic loci for lipids and inflammation. *BMC Genomics* 2016;17:443.
